# Supplementary figures and images for: The origin of Eastern European Jews revealed by autosomal, sex chromosomal and mtDNA polymorphisms
Source: Springer Nature journal article supplement (doi:10.1186/1745-6150-5-57), 2010-01-01

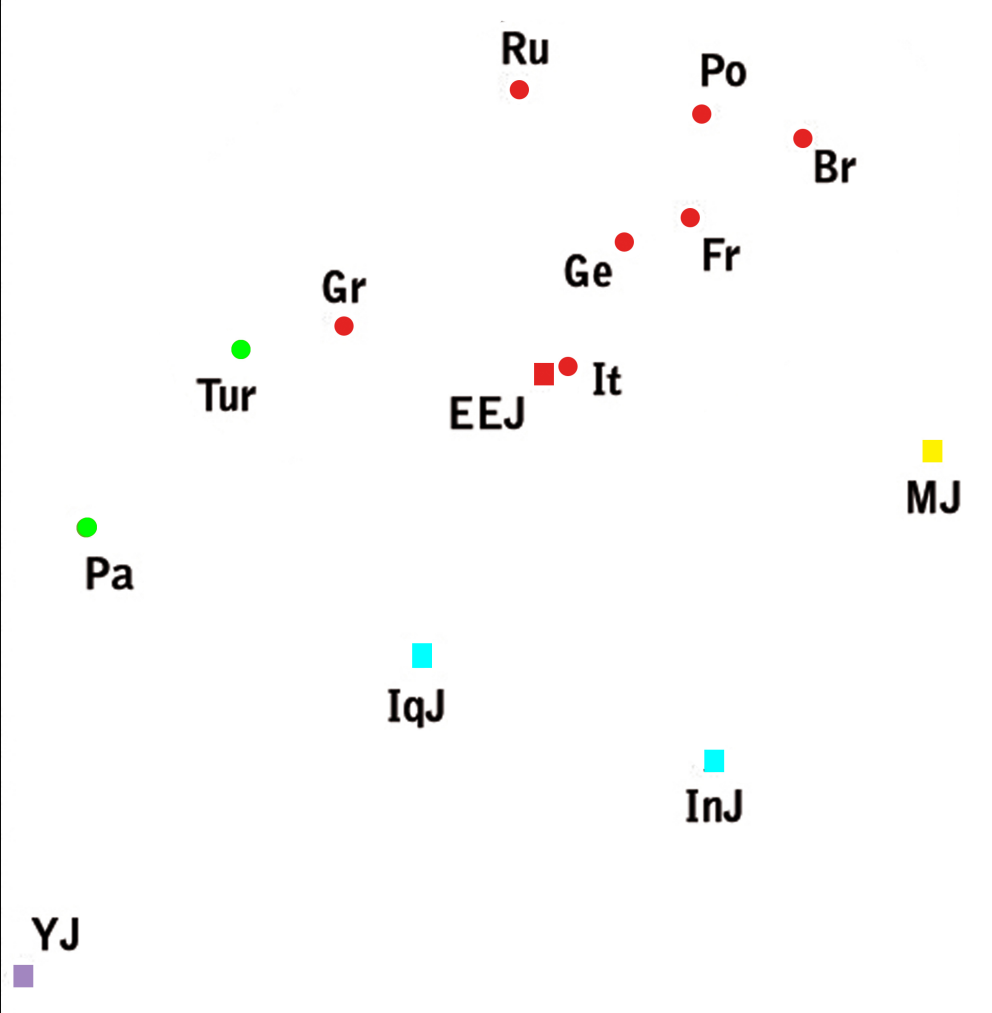

Supplement: 13062_2010_240_MOESM2_ESM.pdf [file 13062_2010_240_MOESM2_ESM.pdf]

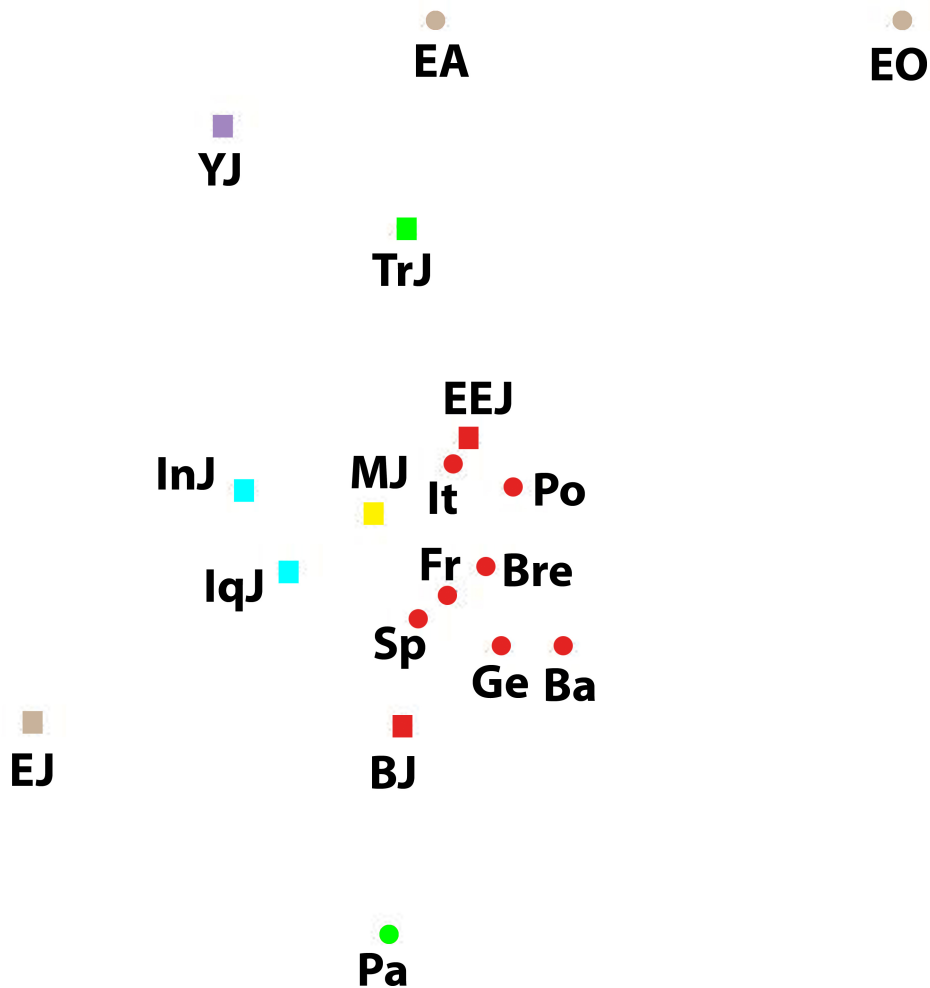

Supplement: 13062_2010_240_MOESM4_ESM.pdf [file 13062_2010_240_MOESM4_ESM.pdf]

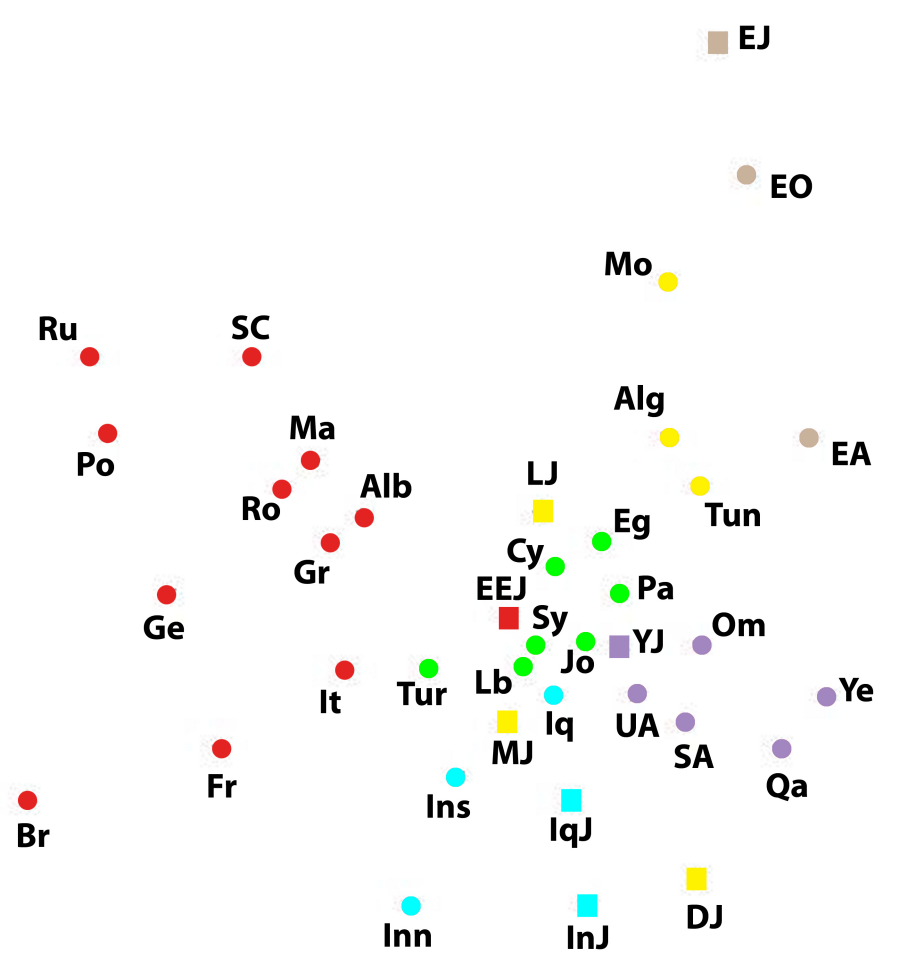

Supplement: 13062_2010_240_MOESM5_ESM.pdf [file 13062_2010_240_MOESM5_ESM.pdf]
